# Supplementary material for: High-Dose Fenofibrate Stimulates Multiple Cellular Stress Pathways in the Kidney of Old Rats
Source: MDPI journal article supplement (doi:10.3390/ijms25053038), 2024-03-06
Supplement: s1 [file s1]

**Supplementary Table S2:** List of primers.

| Gene symbol             | Gene name                                           | Forward and reverse primer sequences                 |
|-------------------------|-----------------------------------------------------|------------------------------------------------------|
| <b>Acox1</b>            | Peroxisomal acyl-coenzyme A oxidase 1               | GTCTCTTGTATTCTCTCTATGG<br>GTAAGATTCATGGACCTCTG       |
| <b>Casp1</b>            | Caspase 1                                           | GCATTAAGAAGGCCCATATAGAGA<br>TGAAGAGAGATCCCTGGACAG    |
| <b>Ccl12 (Mcp5)</b>     | Chemokine (C-C motif) ligand 12                     | CCAGATTCAGTGTTACCCCCA<br>GGCTGCTTGTGATTTTCCTGT       |
| <b>Cftr</b>             | Cystic fibrosis transmembrane conductance regulator | ACCTCCCAACAGCTCAAACA<br>AAGGCTCGAAGTGTCACAG          |
| <b>Cpt1</b>             | Carnitine palmitoyltransferase 1                    | ATGTTTGACCCAAAGCAGTACCCC<br>TCGCTGCGATCATGTAGGAAAC   |
| <b>Crp</b>              | C-reactive protein                                  | AATGTTTTGAACTGGCGGGC<br>TGCCTCAGGACTCACAAACAG        |
| <b>Edn1</b>             | Endothelin 1                                        | AGCGCGTCGTCCCGTATG<br>CTGTTCCCTTGGTCTGTGGT           |
| <b>Hmgcs2</b>           | 3-hydroxy-3-methylglutaryl-CoA synthase 2           | ACCACAAGGTGAACTTCTCTC<br>TTTGGGTAACGGCTCTGCTC        |
| <b>Ho-1</b>             | Heme oxygenase 1                                    | TCAGAAGGGTCAGGTGTCCA<br>GGGTTCTGCTTGTTTCGCTC         |
| <b>Hprt1</b>            | Hypoxanthine phosphoribosyltransferase 1            | TGCTGAAGATTTGGAAAAGGTGT<br>GGCCTCCCATCTCCTTCATG      |
| <b>Il-1b</b>            | Interleukin 1b                                      | GCTACCTATGTCTTGCCCGT<br>CATCCCACGAGTCACAGAGG         |
| <b>Il-6</b>             | Interleukin 6                                       | TGAGAAAAGAGTTGTGCAATGG<br>CCATCATTTCTTTGTATTTCTGGAAG |
| <b>Lcad (Acadl)</b>     | Long-chain acyl-CoA dehydrogenase                   | TCGAGCAGTTTATCCCCCAG<br>TGAACACCTTGCTTCCATTGAG       |
| <b>Mcad (Acadm)</b>     | Medium chain acyl-CoA dehydrogenase                 | GCAGCTGATGATGTGTGCCTA<br>ATCTGGGTTAGATCGCGTCA        |
| <b>Nlrp3</b>            | NLR family pyrin domain containing 3                | GGAGTGGATAGGTTTGCTGGG<br>GAACCTGCTTCTCACATGCC        |
| <b>Nrf2 (Nfe2l2)</b>    | Nuclear factor erythroid 2-related factor 2         | CCCACCTTGAACACAGATTTTCG<br>TAATGGCAGCAGAGGAAGGC      |
| <b>Rplp1</b>            | Ribosomal protein lateral stalk subunit P1          | AAGCAGCTGGTGTCAATGTTG<br>CAGCCCCTACATTGCAGATGA       |
| <b>Serpine1 (Pai-1)</b> | Serpin E1                                           | CCGGCAGCAGATCCAAGAT<br>ATGACCCCATGAGCTCCTTG          |
| <b>Sesn2</b>            | Sestrin 2                                           | CGTAGACACCTCCATGCTCC<br>CATTCTGCGGGTCGTCTTCT         |
| <b>Sirt1</b>            | Sirtuin 1                                           | CAGAACCACCAAAGCGGAAAAA<br>GAAACCCCAGCTCCAGTCAGAA     |
| <b>Slc9a3</b>           | Solute carrier family 9 member A3                   | GGACATCTCAGGACAAATTGGAC<br>GAGCAGATCTTCTCATGAGGACT   |
| <b>Srxn1</b>            | Sulfiredoxin 1                                      | CCCAAGGCGGTGACTACTAC<br>GACCTCACGAGCTTGGCAG          |
| <b>Vegfa</b>            | Vascular endothelial growth factor A                | CATGCGGATCAAACCTCACC<br>TGTTCTATCTTTCTTTGGTCTGCA     |
