# Supplementary material for: High-Dose Fenofibrate Stimulates Multiple Cellular Stress Pathways in the Kidney of Old Rats
Source: MDPI journal article supplement (doi:10.3390/ijms25053038), 2024-03-06
Supplement: s1 [file s1]

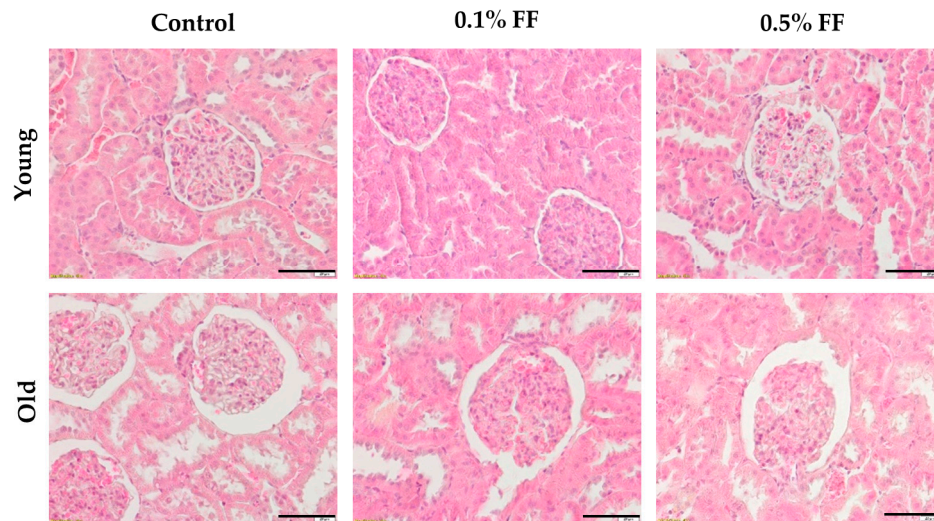

**Figure S1:** Effects of fenofibrate on the kidney morphology in young and old rats - hematoxylin and eosin staining (scale bar 50  $\mu\text{m}$ )
