# Supplementary material for: High-Dose Fenofibrate Stimulates Multiple Cellular Stress Pathways in the Kidney of Old Rats
Source: MDPI journal article supplement (doi:10.3390/ijms25053038), 2024-03-06
Supplement: s1 [file s1]

**Supplementary Table S1:** PCR array for stress and toxicity-associated genes (PARN-003ZA, Qiagen). Differentially expressed genes downregulated at least two-fold are printed in red, while the genes upregulated by at least two-fold are printed in green. Young (y) and old (o) rats treated with 0.1% (y.1, o.1) or 0.5% FF (y.5, o.5) were tested against their age controls. Measurements were performed on cDNA pools of 5 animals *per* group.

| Symbol                  | Description                                                                                  | Molecular pathway  | y.1FF /yC | y.5FF /yC | o.1FF /oC | o.5FF /oC |
|-------------------------|----------------------------------------------------------------------------------------------|--------------------|-----------|-----------|-----------|-----------|
| <b>Fth1</b>             | Ferritin, heavy polypeptide 1                                                                | Oxidative Stress   | 1,12      | -1,53     | 1,01      | -1,63     |
| <b>Gclc</b>             | Glutamate-cysteine ligase, catalytic subunit                                                 | Oxidative Stress   | -2,18     | -2,90     | -1,46     | -3,67     |
| <b>Gclm</b>             | Glutamate cysteine ligase, modifier subunit                                                  | Oxidative Stress   | -1,65     | -1,49     | -1,68     | -2,80     |
| <b>Gsr</b>              | Glutathione reductase                                                                        | Oxidative Stress   | -1,59     | -1,82     | -1,27     | -1,54     |
| <b>Gstp1</b>            | Glutathione S-transferase pi 1                                                               | Oxidative Stress   | -2,31     | -1,75     | -1,35     | -1,38     |
| <b>Hmox1</b>            | Heme oxygenase (decycling) 1                                                                 | Oxidative Stress   | -1,21     | -1,82     | 1,28      | 3,23      |
| <b>Hspa1b</b>           | Heat shock 70kD protein 1B (mapped)                                                          | Oxidative Stress   | -1,31     | 9,30      | -6,14     | 6,76      |
| <b>Nqo1</b>             | NAD(P)H dehydrogenase, quinone 1                                                             | Oxidative Stress   | -1,68     | -1,28     | -1,42     | 1,31      |
| <b>Prdx1</b>            | Peroxiredoxin 1                                                                              | Oxidative Stress   | -1,41     | -1,61     | -1,23     | -1,20     |
| <b>Sqstm1</b>           | Sequestosome 1                                                                               | Oxidative Stress   | -1,51     | -1,74     | -1,39     | -1,31     |
| <b>Txn1</b>             | Thioredoxin 1                                                                                | Oxidative Stress   | -1,40     | -1,44     | -1,17     | -1,26     |
| <b>Txnrd1</b>           | Thioredoxin reductase 1                                                                      | Oxidative Stress   | -1,96     | -2,06     | -1,74     | -1,12     |
| <b>Adm</b>              | Adrenomedullin                                                                               | Hypoxia Signalling | -1,16     | 1,16      | -1,31     | 2,10      |
| <b>Arnt</b>             | Aryl hydrocarbon receptor nuclear translocator                                               | Hypoxia Signalling | -1,92     | 1,27      | -2,20     | 1,90      |
| <b>Bnip3l</b>           | BCL2/adenovirus E1B interacting protein 3-like                                               | Hypoxia Signalling | -1,50     | -2,04     | -1,32     | -1,48     |
| <b>Car9</b>             | Carbonic anhydrase 9                                                                         | Hypoxia Signalling | -1,87     | 5,92      | -1,11     | 10,15     |
| <b>Epo</b>              | Erythropoietin                                                                               | Hypoxia Signalling | -2,28     | 2,85      | -2,19     | 8,95      |
| <b>Ldha</b>             | Lactate dehydrogenase A                                                                      | Hypoxia Signalling | -1,08     | -1,12     | 1,05      | 1,17      |
| <b>Mmp9</b>             | Matrix metalloproteinase 9                                                                   | Hypoxia Signalling | -1,99     | 1,28      | -1,17     | 5,00      |
| <b>Serpine1 (Pai-1)</b> | Serpin peptidase inhibitor, clade E (nexin, plasminogen activator inhibitor type 1), memb. 1 | Hypoxia Signalling | -1,91     | 1,66      | -2,15     | 3,37      |

|                            |                                                                       |                                 |       |       |       |       |
|----------------------------|-----------------------------------------------------------------------|---------------------------------|-------|-------|-------|-------|
| <b>Slc2a1</b>              | Solute carrier family 2 (facilitated glucose transporter), member 1   | Hypoxia Signalling              | -2,33 | -1,92 | -1,39 | -1,43 |
| <b>Vegfa</b>               | Vascular endothelial growth factor A                                  | Hypoxia Signalling              | -2,49 | -1,13 | -2,50 | 1,03  |
| <b>Aqp1</b>                | Aquaporin 1                                                           | Osmotic Stress                  | -2,10 | -1,78 | -1,76 | -1,61 |
| <b>Aqp2</b>                | Aquaporin 2 (collecting duct)                                         | Osmotic Stress                  | -1,40 | 1,14  | -1,55 | -1,45 |
| <b>Aqp4</b>                | Aquaporin 4                                                           | Osmotic Stress                  | -1,77 | 2,14  | -1,96 | 2,29  |
| <b>Cftr</b>                | Cystic fibrosis transmembrane conductance regulator homolog (human)   | Osmotic Stress                  | 1,92  | 30,15 | -4,54 | 6,55  |
| <b>Edn1</b>                | Endothelin 1                                                          | Osmotic Stress                  | -2,20 | 1,43  | -1,68 | 2,70  |
| <b>Hspa4l</b>              | Heat shock protein 4                                                  | Osmotic Stress                  | -1,41 | 1,02  | -1,33 | 2,00  |
| <b>Nfat5</b>               | Nuclear factor of activated T-cells 5                                 | Osmotic Stress                  | -1,71 | 1,86  | -1,72 | 2,88  |
| <b>Slc5a3</b>              | Solute carrier family 5 (sodium/myo-inositol cotransporter), member 3 | Osmotic Stress                  | -3,10 | -2,25 | 1,32  | -2,33 |
| <b>Slc9a3</b>              | Solute carrier family 9 (sodium/hydrogen exchanger), member 3         | Osmotic Stress                  | -3,28 | 1,58  | -2,08 | 3,23  |
| <b>Ccl12</b>               | Chemokine (C-C motif) ligand 12                                       | Inflammatory Response           | -1,02 | 12,21 | -3,96 | 8,52  |
| <b>Cd40lg</b>              | CD40 ligand                                                           | Inflammatory Response           | 1,08  | 8,19  | -3,25 | 8,72  |
| <b>Crp</b>                 | C-reactive protein, pentraxin-related                                 | Inflammatory Response           | -3,02 | 2,88  | -4,62 | 7,86  |
| <b>Ifng</b>                | Interferon gamma                                                      | Inflammatory Response           | -1,11 | 18,08 | -8,22 | 5,81  |
| <b>Il1a</b>                | Interleukin 1 alpha                                                   | Inflammatory Response           | -1,02 | -1,23 | -1,20 | -1,24 |
| <b>Il1b</b>                | Interleukin 1 beta                                                    | Inflammatory Response           | 1,59  | 2,24  | -2,48 | 4,32  |
| <b>Il6</b>                 | Interleukin 6                                                         | Inflammatory Response           | 3,68  | 9,81  | -4,04 | 6,21  |
| <b>Tlr4</b>                | Toll-like receptor 4                                                  | Inflammatory Response           | 1,18  | 3,49  | -1,87 | 5,14  |
| <b>Tnf</b>                 | Tumor necrosis factor (TNF superfamily, member 2)                     | Inflammatory Response           | -2,99 | 1,85  | -2,09 | 6,18  |
| <b>Cdkn1a (Cip1, Waf1)</b> | Cyclin-dependent kinase inhibitor 1A                                  | Cell Cycle Arrest & Checkpoints | -1,06 | -2,05 | -1,05 | -1,14 |
| <b>Chek1</b>               | CHK1 checkpoint homolog (S. pombe)                                    | Cell Cycle Arrest & Checkpoints | -1,67 | 6,34  | -2,32 | 5,69  |
| <b>Chek2</b>               | CHK2 checkpoint homolog (S. pombe)                                    | Cell Cycle Arrest & Checkpoints | -1,57 | 3,17  | -2,15 | 4,59  |

|                              |                                                                                  |                                 |       |       |       |       |
|------------------------------|----------------------------------------------------------------------------------|---------------------------------|-------|-------|-------|-------|
| <b>Ddit3 (Gadd153, Chop)</b> | DNA-damage inducible transcript 3                                                | Cell Cycle Arrest & Checkpoints | -2,45 | -1,92 | -1,44 | 1,47  |
| <b>Hus1</b>                  | HUS1 checkpoint homolog (S. pombe)                                               | Cell Cycle Arrest & Checkpoints | -1,49 | 1,13  | -1,45 | 2,11  |
| <b>Mre11a</b>                | meiotic recombination 11 homolog A (S. cerevisiae)                               | Cell Cycle Arrest & Checkpoints | -1,63 | 2,08  | -2,60 | 3,39  |
| <b>Nbn (Nbs1)</b>            | Nibrin                                                                           | Cell Cycle Arrest & Checkpoints | -1,08 | 1,23  | 1,32  | 1,34  |
| <b>Rad17</b>                 | RAD17 homolog (S. pombe)                                                         | Cell Cycle Arrest & Checkpoints | -1,45 | -1,17 | -1,38 | 1,37  |
| <b>Rad9</b>                  | RAD9 homolog (S. pombe)                                                          | Cell Cycle Arrest & Checkpoints | -1,87 | 1,15  | -1,76 | 1,52  |
| <b>Atm</b>                   | Ataxia telangiectasia mutated homolog (human)                                    | Other DNA Damage Responses      | -1,45 | 2,57  | -2,21 | 3,18  |
| <b>Ddb2</b>                  | Damage specific DNA binding protein 2                                            | Other DNA Damage Responses      | -1,60 | -1,07 | -1,99 | 1,48  |
| <b>Gadd45a</b>               | Growth arrest and DNA-damage-inducible, alpha                                    | Other DNA Damage Responses      | -1,24 | -1,19 | -1,31 | -1,26 |
| <b>Gadd45g</b>               | Growth arrest and DNA-damage-inducible, gamma                                    | Other DNA Damage Responses      | -1,52 | 2,01  | -3,54 | -1,08 |
| <b>Rad51</b>                 | RAD51 homolog (RecA homolog, E. coli) (S. cerevisiae)                            | Other DNA Damage Responses      | -1,32 | 5,68  | -2,63 | 5,66  |
| <b>Tp53 (p53)</b>            | Tumor protein p53                                                                | Other DNA Damage Responses      | -1,40 | -1,15 | -1,36 | 1,08  |
| <b>Xpc</b>                   | Xeroderma pigmentosum, complementation group C                                   | Other DNA Damage Responses      | -1,64 | -1,12 | -1,85 | 1,01  |
| <b>Casp1 (Ice)</b>           | Caspase 1                                                                        | Apoptosis                       | 1,11  | 2,25  | -1,60 | 2,55  |
| <b>Casp7</b>                 | Caspase 7                                                                        | Apoptosis                       | -1,78 | -2,00 | -1,46 | 1,25  |
| <b>Fas</b>                   | Fas (TNF receptor superfamily, member 6)                                         | Apoptosis                       | 1,04  | 1,25  | -1,26 | 1,08  |
| <b>Mcl1</b>                  | Myeloid cell leukemia sequence 1                                                 | Apoptosis                       | -1,29 | -2,50 | -1,04 | -1,36 |
| <b>Tnfrsf10b</b>             | G03 Rn.105558 NM_001108873 Tumor necrosis factor receptor superfamily, memb. 10b | Apoptosis                       | -1,44 | -3,18 | -1,44 | -1,32 |
| <b>Tnfrsf1a (Tnfr1)</b>      | Tumor necrosis factor receptor superfamily, member 1a                            | Apoptosis                       | -1,45 | -1,29 | -2,14 | 1,10  |
| <b>Grb2</b>                  | Growth factor receptor bound protein 2                                           | Necrosis                        | -1,54 | -1,82 | -1,39 | -1,02 |
| <b>Parp1 (Adprt1)</b>        | Poly (ADP-ribose) polymerase 1                                                   | Necrosis                        | -1,29 | -1,23 | -1,10 | 1,27  |
| <b>Parp2</b>                 | Poly (ADP-ribose) polymerase 2                                                   | Necrosis                        | -1,18 | 1,16  | -1,78 | 1,51  |
| <b>Pvr</b>                   | Poliovirus receptor                                                              | Necrosis                        | -3,11 | -1,74 | -2,13 | 2,62  |

|                      |                                                                         |                           |       |       |       |       |
|----------------------|-------------------------------------------------------------------------|---------------------------|-------|-------|-------|-------|
| <b>Ripk1</b>         | Receptor (TNFRSF)-interacting serine-threonine kinase 1                 | Necrosis                  | -2,00 | -1,15 | -1,55 | 1,30  |
| <b>Ripk3</b>         | Receptor-interacting serine-threonine kinase 3                          | Necrosis                  | -1,52 | 1,62  | -1,85 | 2,58  |
| <b>Txn14b</b>        | Thioredoxin-like 4B                                                     | Necrosis                  | -1,67 | 1,18  | -1,78 | 2,04  |
| <b>Atg12</b>         | ATG12 autophagy related 12 homolog (S. cerevisiae)                      | Autophagy                 | -1,12 | -1,26 | -1,29 | 1,26  |
| <b>Atg7</b>          | ATG7 autophagy related 7 homolog (S. cerevisiae)                        | Autophagy                 | -1,46 | 1,02  | -1,31 | 1,73  |
| <b>Becn1</b>         | Beclin 1, autophagy related                                             | Autophagy                 | -1,34 | -1,11 | -1,75 | -1,46 |
| <b>Ulk1</b>          | Unc-51 like kinase 1 (C. elegans)                                       | Autophagy                 | -1,94 | 1,13  | -1,98 | 1,63  |
| <b>Atf4</b>          | Activating transcription factor 4 (tax-responsive enhancer element B67) | Unfolded Protein Response | -2,19 | -1,46 | -1,53 | 1,08  |
| <b>Atf6</b>          | Activating transcription factor 6                                       | Unfolded Protein Response | -1,69 | 1,89  | -2,83 | 1,79  |
| <b>Bbc3</b>          | Bcl-2 binding component 3                                               | Unfolded Protein Response | -1,71 | -1,24 | -2,19 | 1,04  |
| <b>Bid</b>           | BH3 interacting domain death agonist                                    | Unfolded Protein Response | -1,71 | -1,00 | -1,63 | 2,57  |
| <b>Calr</b>          | Calreticulin                                                            | Unfolded Protein Response | -1,91 | -1,47 | -1,49 | -1,47 |
| <b>Dnajc3</b>        | DnaJ (Hsp40) homolog, subfamily C, member 3                             | Unfolded Protein Response | -1,31 | -1,06 | -1,31 | -1,04 |
| <b>Hsp90aa1</b>      | Heat shock protein 90, alpha (cytosolic), class A member 1              | Unfolded Protein Response | -1,55 | -1,75 | 1,00  | 1,50  |
| <b>Hsp90b1</b>       | Heat shock protein 90, beta, member 1                                   | Unfolded Protein Response | -1,87 | -2,00 | -1,29 | -1,52 |
| <b>Hspa4 (Hsp70)</b> | Heat shock protein 4-like                                               | Unfolded Protein Response | -1,23 | -1,51 | -1,38 | -1,12 |
| <b>Hspa5 (Grp78)</b> | Heat shock protein 5                                                    | Unfolded Protein Response | -2,28 | -2,76 | -1,01 | -1,55 |
| <b>Xbp1</b>          | X-box binding protein 1                                                 | Unfolded Protein Response | -2,07 | -2,37 | 1,01  | -1,57 |
| <b>Hprt1</b>         | Hypoxanthine phosphoribosyltransferase 1                                | <i>Housekeeping gene</i>  | -1,03 | -1,11 | -1,03 | -1,04 |
| <b>Rplp1</b>         | Ribosomal protein, large, P1                                            | <i>Housekeeping gene</i>  | 1,03  | 1,11  | 1,03  | 1,04  |
