# Supplementary figures and images for: High-Dose Fenofibrate Stimulates Multiple Cellular Stress Pathways in the Kidney of Old Rats
Source: MDPI journal article supplement (doi:10.3390/ijms25053038), 2024-03-06

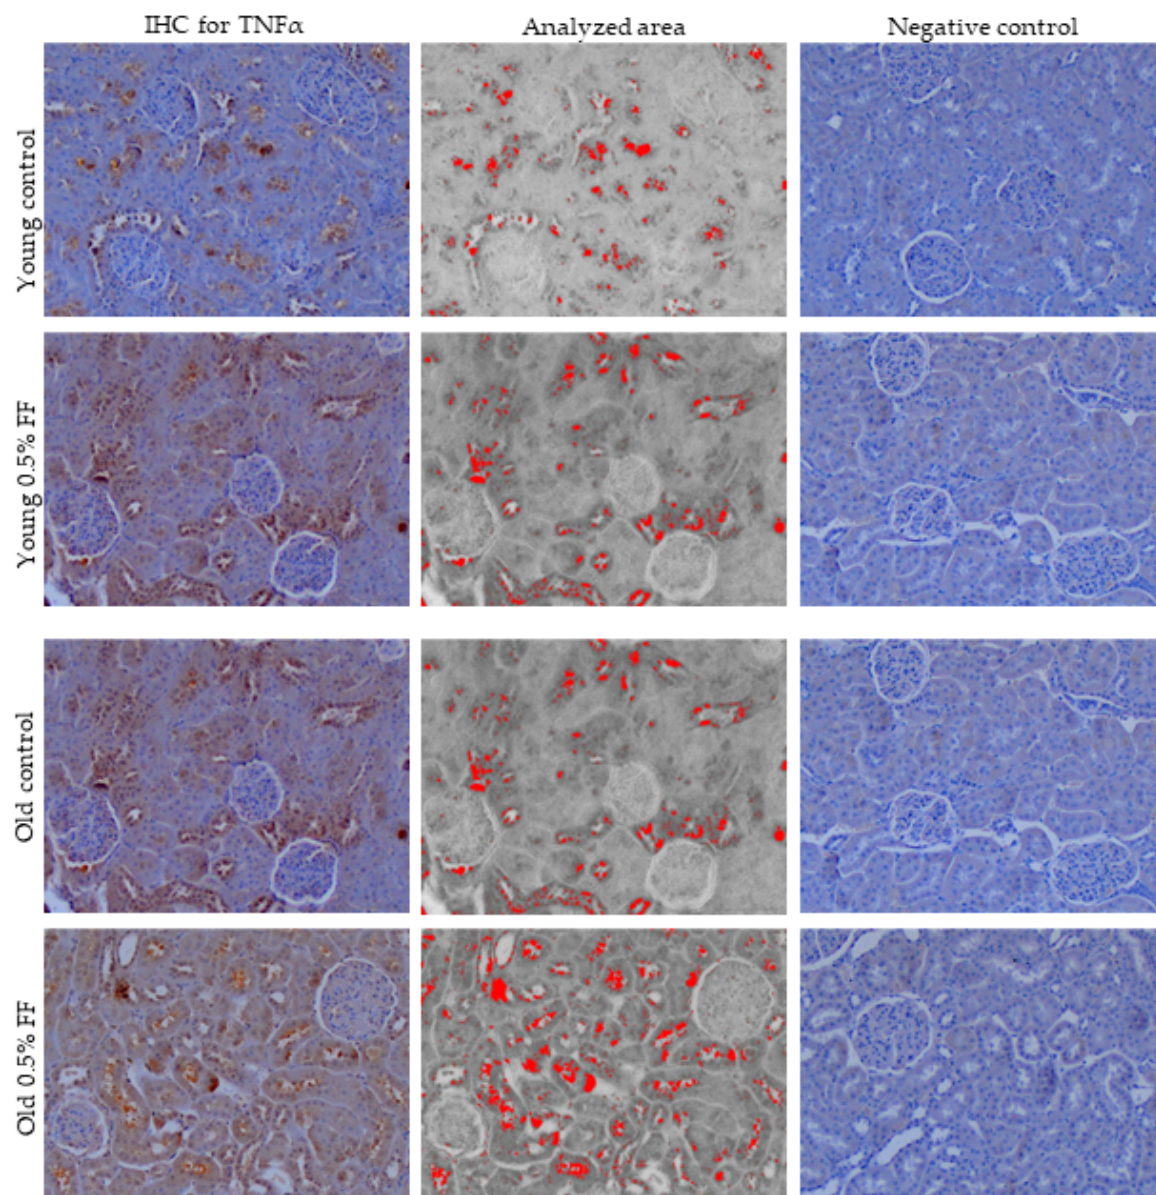

**Figure S2:** Immunohisto- chemical staining for TNF $\alpha$  – examples of image analyses.

Supplement: s1 [file s1]
